# Supplementary material
Source: publisher figshare collection journal article supplement (https://frontiersin.figshare.com/ndownloader/files/24028403)
Supplement: Supplementary file [file 24028403]

# Consensus on the Reporting and Experimental Design of clinical and cognitive-behavioural Neurofeedback studies (CRED-nf) best practices checklist 2019\*

| Domain                         | Item # | Checklist item                                                                                                                                          | Reported on page #        |
|--------------------------------|--------|---------------------------------------------------------------------------------------------------------------------------------------------------------|---------------------------|
| <b>Pre-experiment</b>          |        |                                                                                                                                                         |                           |
|                                | 1a     | Pre-register experimental protocol and planned analyses                                                                                                 | not clinical              |
|                                | 1b     | Justify sample size                                                                                                                                     | Page 6.                   |
| <b>Control groups</b>          |        |                                                                                                                                                         |                           |
|                                | 2a     | Employ control group(s) or control condition(s)                                                                                                         | Page 7-8.                 |
|                                | 2b     | When leveraging experimental designs where a double-blind is possible, use a double-blind                                                               | NA                        |
|                                | 2c     | Blind those who rate the outcomes, and when possible, the statisticians involved                                                                        | NA                        |
|                                | 2d     | Examine to what extent participants and experimenters remain blinded                                                                                    | NA                        |
|                                | 2e     | In clinical efficacy studies, employ a standard-of-care intervention group as a benchmark for improvement                                               | NA                        |
| <b>Control measures</b>        |        |                                                                                                                                                         |                           |
|                                | 3a     | Collect data on psychosocial factors                                                                                                                    | Table 1                   |
|                                | 3b     | Report whether participants were provided with a strategy                                                                                               | Page 7                    |
|                                | 3c     | Report the strategies participants used                                                                                                                 | Autobiographical Memories |
|                                | 3d     | Report methods used for online-data processing and artifact correction                                                                                  | Page 8                    |
|                                | 3e     | Report condition and group effects for artifacts                                                                                                        |                           |
| <b>Feedback specifications</b> |        |                                                                                                                                                         |                           |
|                                | 4a     | Report how the online-feature extraction was defined                                                                                                    | Page 8                    |
|                                | 4b     | Report and justify the reinforcement schedule                                                                                                           | Page 8                    |
|                                | 4c     | Report the feedback modality and content                                                                                                                | Page 8 and 9              |
|                                | 4d     | Collect and report all brain activity variable(s) and/or contrasts used for feedback, as displayed to experimental participants                         | Page 9-10                 |
|                                | 4e     | Report the hardware and software used                                                                                                                   | Page 8                    |
| <b>Outcome measures</b>        |        |                                                                                                                                                         |                           |
| Brain                          | 5a     | Report neurofeedback regulation success based on the feedback signal                                                                                    | Quevedo 2019              |
|                                | 5b     | Plot within-session and between-session regulation blocks of feedback variable(s), as well as pre-to-post resting baselines or contrasts                | Quevedo 2019              |
|                                | 5c     | Statistically compare the experimental condition/group to the control condition(s)/group(s) (not only each group to baseline measures)                  | Page 9                    |
| Behaviour                      | 6a     | Include measures of clinical or behavioural significance, defined a priori, and describe whether they were reached                                      | Page 6                    |
|                                | 6b     | Run correlational analyses between regulation success and behavioural outcomes                                                                          | Table 3                   |
| <b>Data storage</b>            |        |                                                                                                                                                         |                           |
|                                | 7a     | Upload all materials, analysis scripts, code, and raw data used for analyses, as well as final values, to an open access data repository, when feasible | Not feasible at this time |

\*Darker shaded boxes represent *Essential* checklist items; lightly shaded boxes represent *Encouraged* checklist items. If a checklist item is “not addressed” in the manuscript, enter “N” in place of the page number. We recommend using this checklist in conjunction with the CRED-nf article, which explains the motivation behind this checklist and provides details regarding many of the checklist items.
